# Supplementary material for: Impact of COVID-19 Pandemic on Oncological Surgery Activities: A Retrospective Study from a Southern Italian Region
Source: MDPI journal article supplement (doi:10.3390/healthcare10112329), 2022-11-21
Supplement: s1 [file s1]

# Supplementary materials

**Table S1. Comparison of admissions occurred between 2020 and the mean of the years 2018-19**

|                          | 2018-2019<br><i>mean (SD)</i> | 2020<br><i>N</i> | Diff.<br>% | p-value            |
|--------------------------|-------------------------------|------------------|------------|--------------------|
| <b>Colorectal Cancer</b> |                               |                  |            |                    |
| Admissions               | 648.5 ( $\pm$ 85.56)          | 604              | -35.71     |                    |
| Age                      |                               |                  |            |                    |
| 18-44                    | 52 (8.02)                     | 13 (2.15)        | -75.00     |                    |
| 45-74                    | 331 (51.04)                   | 327 (54.14)      | -1.20      | <0.001*            |
| $\geq$ 75                | 265.5 (40.94)                 | 264 (43.71)      | -0.56      |                    |
| LOS median (IQR)         | 10 (7-16)                     | 10 (7-15)        |            | 0.197 <sup>+</sup> |
| In-hospital Death N(%)   | 25.5 (3.93)                   | 22 (3.64)        | -13.72     | 0.180*             |
| <b>Breast Cancer</b>     |                               |                  |            |                    |
| Admissions               | 1078.5<br>( $\pm$ 82.73)      | 1012             | -10.36     |                    |
| Age                      |                               |                  |            |                    |
| 18-44                    | 168 (15.58)                   | 114 (11.26)      | -32.14     |                    |
| 45-74                    | 649.5 (60.22)                 | 676 (66.80)      | +4.08      | <0.001*            |
| $\geq$ 75                | 261 (24.20)                   | 222 (21.94)      | -14.94     |                    |
| LOS median (IQR)         | 2 (1-3)                       | 2 (1-3)          |            | 0.189              |
| In-hospital Death N(%)   | 0 (0.00)                      | 0 (0.00)         |            | NA                 |

\*Pearson's Chi-Squared Test

<sup>+</sup>Mann-Whitney U test

LOS: length of stay; IQR: interquartile range; NA: Not applicable

**Table S2. Hospitalization rate ratios of colorectal and breast cancer in 2020 compared to the two-year period 2018-19**

|                          | HRR (95%CI)         | p-value* |
|--------------------------|---------------------|----------|
| <b>Colorectal cancer</b> |                     |          |
| 2020 vs. 2018-2019       | 0.915 (0.914-0.916) | <0.001   |
| <b>Breast cancer</b>     |                     |          |
| 2020 vs. 2018-2019       | 0.895 (0.894-0.897) | <0.001   |

\*All models were adjusted for hospital, age and gender (only for colorectal cancer)

HRR: hospitalization rate ratio; 95%CI: 95% confidence interval;

**Table S3. Admissions for Colorectal cancer surgery by hospital**

|                   |      | <b>Age Class</b> |       |           |
|-------------------|------|------------------|-------|-----------|
| <b>Hospitals</b>  |      | 18-44            | 45-74 | $\geq$ 75 |
| L'Aquila Hospital | 2018 | 0                | 30    | 23        |
|                   | 2019 | 10               | 30    | 17        |
|                   | 2020 | 1                | 33    | 12        |
| Sulmona Hospital  | 2018 | 0                | 6     | 5         |
|                   | 2019 | 2                | 14    | 4         |
|                   | 2020 | 0                | 7     | 10        |
| Avezzano Hospital | 2018 | 1                | 26    | 22        |
|                   | 2019 | 9                | 35    | 18        |

|                           |      |    |    |    |
|---------------------------|------|----|----|----|
|                           | 2020 | 1  | 21 | 19 |
| Castel di Sangro Hospital | 2018 | 0  | 0  | 0  |
|                           | 2019 | 1  | 1  | 1  |
|                           | 2020 | 0  | 0  | 0  |
| Tagliacozzo Hospital      | 2018 | 0  | 0  | 0  |
|                           | 2019 | 0  | 1  | 0  |
|                           | 2020 | 0  | 0  | 0  |
| Private Hospital 1        | 2018 | 0  | 5  | 9  |
|                           | 2019 | 0  | 6  | 8  |
|                           | 2020 | 0  | 8  | 0  |
| Private Hospital 2        | 2018 | 0  | 0  | 0  |
|                           | 2019 | 0  | 2  | 0  |
|                           | 2020 | 0  | 0  | 0  |
| Teramo Hospital           | 2018 | 1  | 11 | 18 |
|                           | 2019 | 10 | 26 | 20 |
|                           | 2020 | 1  | 38 | 27 |
| Giulianova Hospital       | 2018 | 0  | 10 | 6  |
|                           | 2019 | 1  | 15 | 10 |
|                           | 2020 | 0  | 2  | 8  |
| Atri Hospital             | 2018 | 1  | 15 | 13 |
|                           | 2019 | 2  | 10 | 9  |
|                           | 2020 | 0  | 12 | 10 |
| S Omero Hospital          | 2018 | 0  | 10 | 8  |
|                           | 2019 | 5  | 9  | 8  |
|                           | 2020 | 1  | 8  | 14 |
| Pescara Hospital          | 2018 | 3  | 59 | 61 |
|                           | 2019 | 11 | 33 | 17 |
|                           | 2020 | 4  | 43 | 25 |
| Penne Hospital            | 2018 | 0  | 15 | 11 |
|                           | 2019 | 2  | 2  | 5  |
|                           | 2020 | 1  | 9  | 7  |
| Popoli Hospital           | 2018 | 0  | 2  | 1  |
|                           | 2019 | 1  | 2  | 1  |
|                           | 2020 | 0  | 9  | 3  |
| Private Hospital 3        | 2018 | 1  | 21 | 23 |
|                           | 2019 | 2  | 16 | 11 |
|                           | 2020 | 0  | 32 | 30 |
| Private Hospital 4        | 2018 | 1  | 53 | 38 |
|                           | 2019 | 1  | 22 | 16 |
|                           | 2020 | 2  | 48 | 40 |
| Chieti Hospital           | 2018 | 3  | 48 | 35 |
|                           | 2019 | 14 | 22 | 15 |
|                           | 2020 | 0  | 16 | 20 |
| Lanciano Hospital         | 2018 | 0  | 10 | 20 |
|                           | 2019 | 7  | 8  | 10 |
|                           | 2020 | 1  | 17 | 11 |

|                    |      |   |    |    |
|--------------------|------|---|----|----|
| Vasto Hospital     | 2018 | 2 | 32 | 17 |
|                    | 2019 | 9 | 13 | 16 |
|                    | 2020 | 1 | 11 | 12 |
| Atessa Hospital    | 2018 | 0 | 0  | 0  |
|                    | 2019 | 0 | 0  | 3  |
|                    | 2020 | 0 | 0  | 0  |
| Ortona Hospital    | 2018 | 0 | 6  | 2  |
|                    | 2019 | 1 | 7  | 8  |
|                    | 2020 | 0 | 0  | 0  |
| Private Hospital 5 | 2018 | 0 | 0  | 0  |
|                    | 2019 | 0 | 3  | 2  |
|                    | 2020 | 0 | 0  | 0  |
| Private Hospital 6 | 2018 | 0 | 0  | 0  |
|                    | 2019 | 1 | 3  | 1  |
|                    | 2020 | 0 | 0  | 0  |
| Private Hospital 7 | 2018 | 0 | 9  | 4  |
|                    | 2019 | 1 | 8  | 3  |
|                    | 2020 | 0 | 5  | 9  |
| Private Hospital 8 | 2018 | 0 | 0  | 0  |
|                    | 2019 | 0 | 0  | 2  |
|                    | 2020 | 0 | 0  | 0  |

**Table S4. Admissions for Breast cancer surgery by hospital**

|                           |      | Age Class |       |      |
|---------------------------|------|-----------|-------|------|
| Hospitals                 |      | 18-44     | 45-74 | >=75 |
| L'Aquila Hospital         | 2018 | 0         | 30    | 23   |
|                           | 2019 | 10        | 30    | 17   |
|                           | 2020 | 1         | 33    | 12   |
| Sulmona Hospital          | 2018 | 0         | 6     | 5    |
|                           | 2019 | 2         | 14    | 4    |
|                           | 2020 | 0         | 7     | 10   |
| Avezzano Hospital         | 2018 | 1         | 26    | 22   |
|                           | 2019 | 9         | 35    | 18   |
|                           | 2020 | 1         | 21    | 19   |
| Castel di Sangro Hospital | 2018 | 0         | 0     | 0    |
|                           | 2019 | 1         | 1     | 1    |
|                           | 2020 | 0         | 0     | 0    |
| Tagliacozzo Hospital      | 2018 | 0         | 0     | 0    |
|                           | 2019 | 0         | 1     | 0    |
|                           | 2020 | 0         | 0     | 0    |
| Private Hospital 1        | 2018 | 0         | 5     | 9    |
|                           | 2019 | 0         | 6     | 8    |
|                           | 2020 | 0         | 8     | 0    |
| Private Hospital 2        | 2018 | 0         | 0     | 0    |

|                     |      |    |    |    |
|---------------------|------|----|----|----|
|                     | 2019 | 0  | 2  | 0  |
|                     | 2020 | 0  | 0  | 0  |
| Teramo Hospital     | 2018 | 1  | 11 | 18 |
|                     | 2019 | 10 | 26 | 20 |
|                     | 2020 | 1  | 38 | 27 |
| Giulianova Hospital | 2018 | 0  | 10 | 6  |
|                     | 2019 | 1  | 15 | 10 |
|                     | 2020 | 0  | 2  | 8  |
| Atri Hospital       | 2018 | 1  | 15 | 13 |
|                     | 2019 | 2  | 10 | 9  |
|                     | 2020 | 0  | 12 | 10 |
| S Omero Hospital    | 2018 | 0  | 10 | 8  |
|                     | 2019 | 5  | 9  | 8  |
|                     | 2020 | 1  | 8  | 14 |
| Pescara Hospital    | 2018 | 3  | 59 | 61 |
|                     | 2019 | 11 | 33 | 17 |
|                     | 2020 | 4  | 43 | 25 |
| Penne Hospital      | 2018 | 0  | 15 | 11 |
|                     | 2019 | 2  | 2  | 5  |
|                     | 2020 | 1  | 9  | 7  |
| Popoli Hospital     | 2018 | 0  | 2  | 1  |
|                     | 2019 | 1  | 2  | 1  |
|                     | 2020 | 0  | 9  | 3  |
| Private Hospital 3  | 2018 | 1  | 21 | 23 |
|                     | 2019 | 2  | 16 | 11 |
|                     | 2020 | 0  | 32 | 30 |
| Private Hospital 4  | 2018 | 1  | 53 | 38 |
|                     | 2019 | 1  | 22 | 16 |
|                     | 2020 | 2  | 48 | 40 |
| Chieti Hospital     | 2018 | 3  | 48 | 35 |
|                     | 2019 | 14 | 22 | 15 |
|                     | 2020 | 0  | 16 | 20 |
| Lanciano Hospital   | 2018 | 0  | 10 | 20 |
|                     | 2019 | 7  | 8  | 10 |
|                     | 2020 | 1  | 17 | 11 |
| Vasto Hospital      | 2018 | 2  | 32 | 17 |
|                     | 2019 | 9  | 13 | 16 |
|                     | 2020 | 1  | 11 | 12 |
| Atessa Hospital     | 2018 | 0  | 0  | 0  |
|                     | 2019 | 0  | 0  | 3  |
|                     | 2020 | 0  | 0  | 0  |
| Ortona Hospital     | 2018 | 0  | 6  | 2  |
|                     | 2019 | 1  | 7  | 8  |
|                     | 2020 | 0  | 0  | 0  |
| Private Hospital 5  | 2018 | 0  | 0  | 0  |
|                     | 2019 | 0  | 3  | 2  |
|                     | 2020 | 0  | 0  | 0  |

|                    |      |   |   |   |
|--------------------|------|---|---|---|
| Private Hospital 6 | 2018 | 0 | 0 | 0 |
|                    | 2019 | 1 | 3 | 1 |
|                    | 2020 | 0 | 0 | 0 |
| Private Hospital 7 | 2018 | 0 | 9 | 4 |
|                    | 2019 | 1 | 8 | 3 |
|                    | 2020 | 0 | 5 | 9 |
| Private Hospital 8 | 2018 | 0 | 0 | 0 |
|                    | 2019 | 0 | 0 | 2 |
|                    | 2020 | 0 | 0 | 0 |
